# Supplementary material for: Redox Modification of PKA-Cα Differentially Affects Its Substrate Selection
Source: MDPI journal article supplement (doi:10.3390/life13091811), 2023-08-26
Supplement: s1 [file s1]

## Supplementary Information

Delva-Wiley et al.

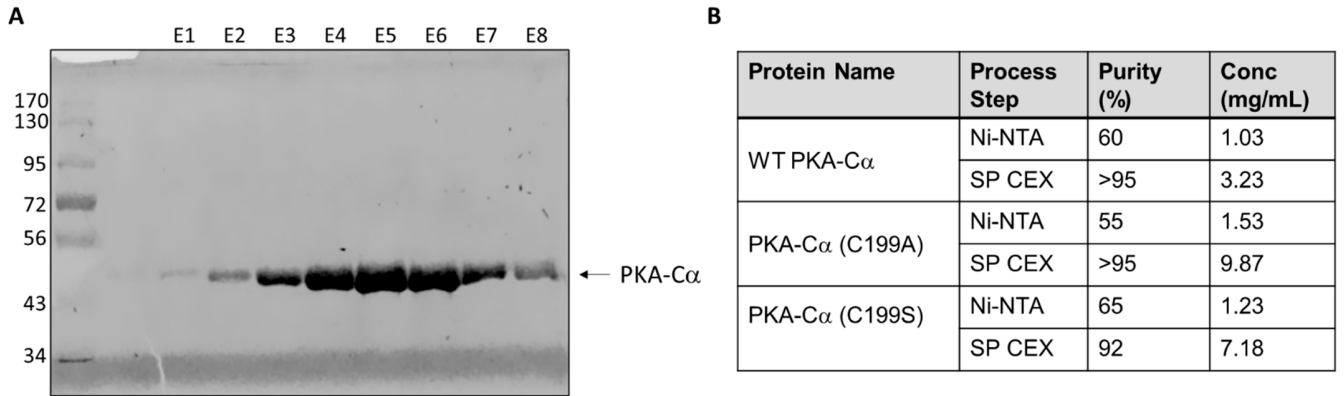

**Figure S1. Purification of PKA-C $\alpha$ .** **A.** SDS-PAGE gel, stained with colloidal Coomassie-G250, following SP cation exchange (SP CEX) chromatography. The SP product exhibited a migration pattern consistent with His<sub>6</sub>-PKA-C $\alpha$  (arrow). **B.** Process purification summary for wild-type (WT) PKA-C $\alpha$ , PKA-C $\alpha$  (C199A), and PKA-C $\alpha$ (199S).

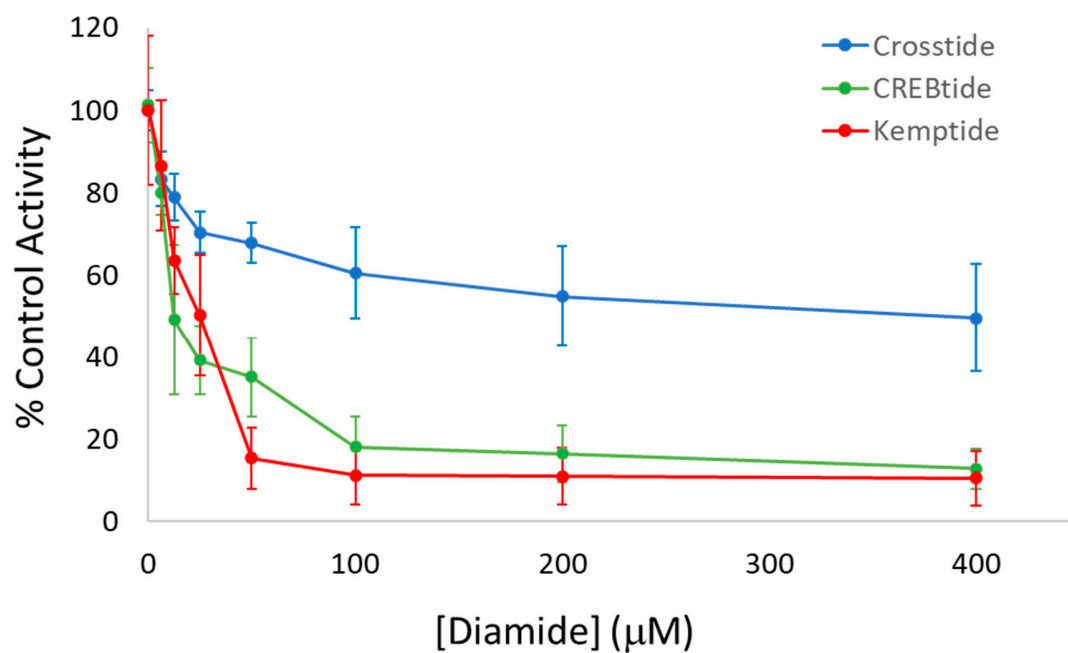

**Figure S2. Impact of diamide-mediated oxidation on PKA-C $\alpha$  toward different model substrates following an extended incubation with diamide.** Normalized relative activity of PKA-C $\alpha$  toward Kemptide (red), CREBtide (green) and Crosstide (blue) following pre-treatment with the indicated concentrations of diamide for 20 minutes at room temperature.

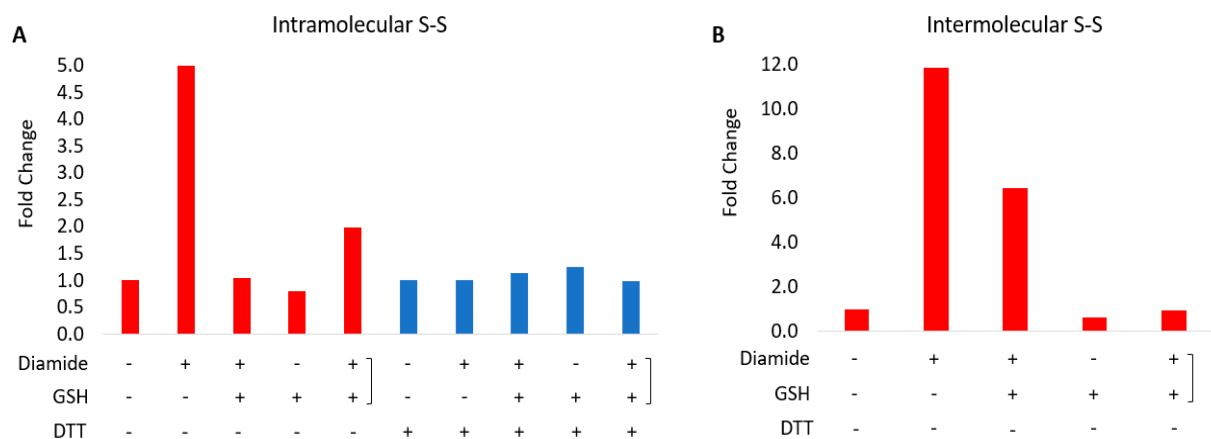

**Figure S3. Quantitation of band intensities for intra- and intermolecular disulfide bonded species in non-reducing PAGE following treatment with diamide and/or glutathione. A.** Normalized intensities, expressed as fold change relative to the untreated control, of the faster migrating species in Figure 1D (corresponding to PKA-C $\alpha$  that has formed an intramolecular disulfide bond) in the absence (red) and presence (blue) of reducing agent. DTT: dithiothreitol; GSH: reduced glutathione. Brackets in wells 5 and 10 indicate that diamide and GSH were added simultaneously. **B.** Normalized intensities, expressed as fold change relative to the untreated control, of the slower migrating species in Figure 1D (corresponding to PKA-C $\alpha$  that has formed intermolecular disulfide bonds) in the absence of reducing agent. Abbreviations are as in A.

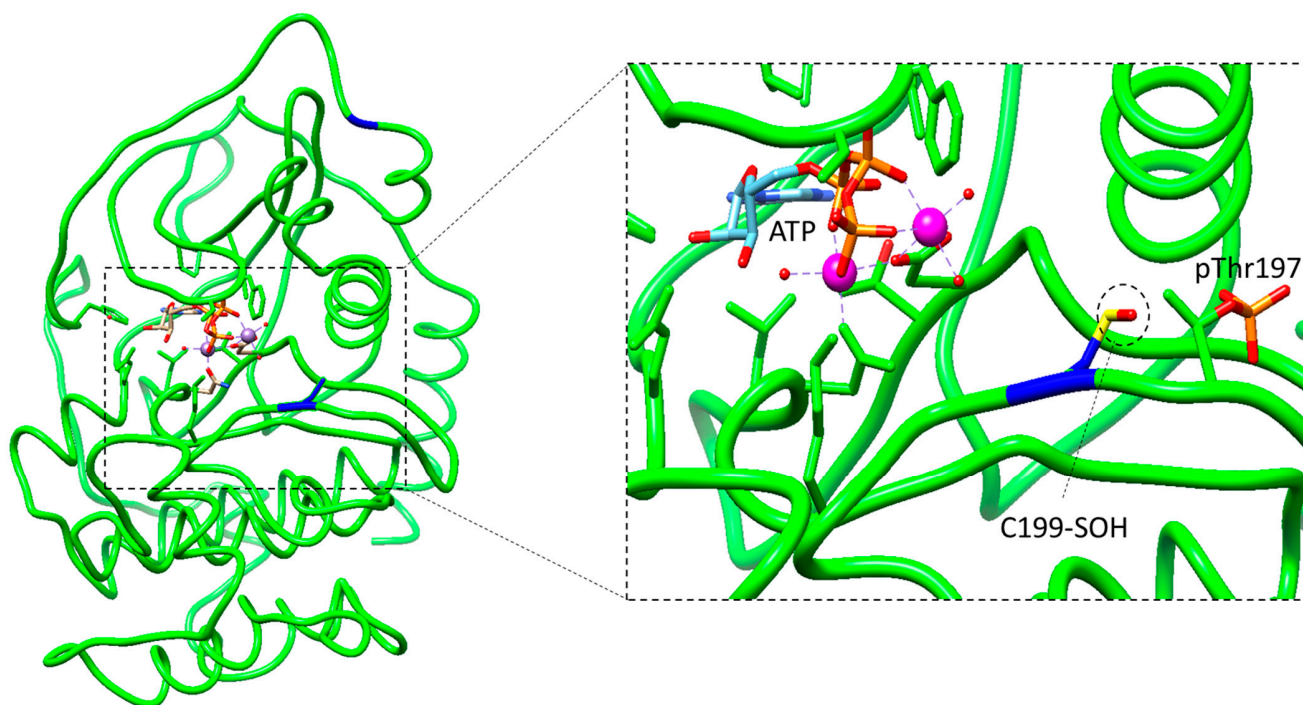

**Figure S4. Sulfenylated C199 is well accommodated within PKA-Ca's active site.** The sulfhydryl group of C199 in PKA-Ca bound to ATP (PDB: 1ATP) was converted to sulfenic acid in silico using the "build" tool in Chimera-X. The modified structure was then energy minimized by molecular dynamics simulation by UCSF Chimera-X. Sulfenylated C199 (C199-SOH), phospho-T197 (pThr197) and ATP are labeled.

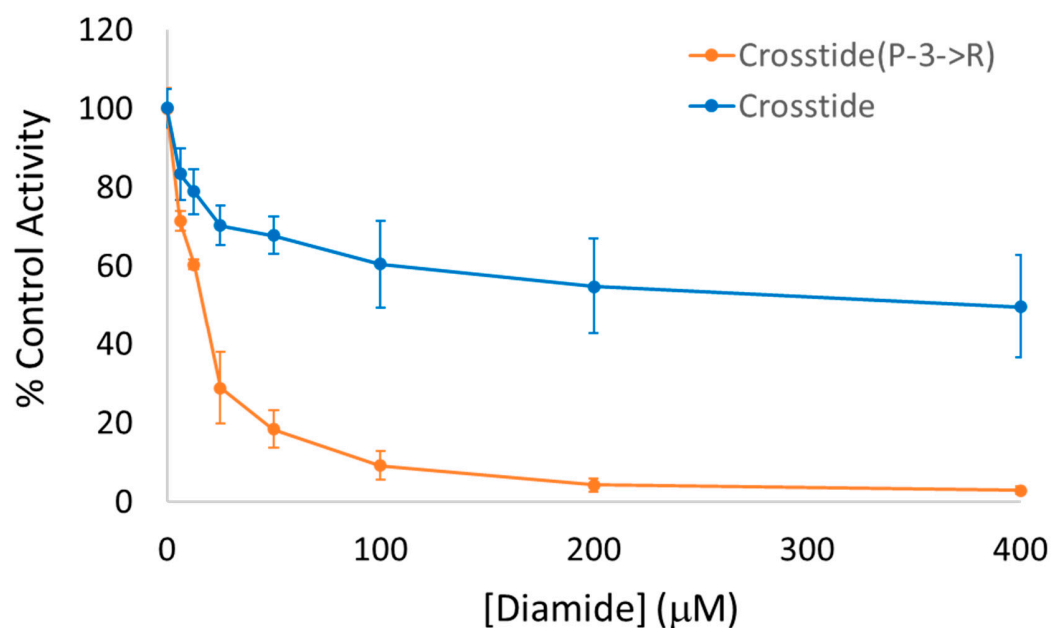

**Figure S5. Impact of diamide-mediated oxidation on PKA-C $\alpha$  toward Crosstide and Crosstide(P-3 $\rightarrow$ R).** Normalized relative activity of PKA-C $\alpha$  toward Crosstide (blue) and a Crosstide variant in which the Pro residue in the P-3 position has been mutated to Arg (Crosstide(P-3 $\rightarrow$ R)) following pre-treatment with the indicated concentrations of diamide for 10 minutes at room temperature. Error bars represent standard error about the mean of three independent experiments run in duplicate.

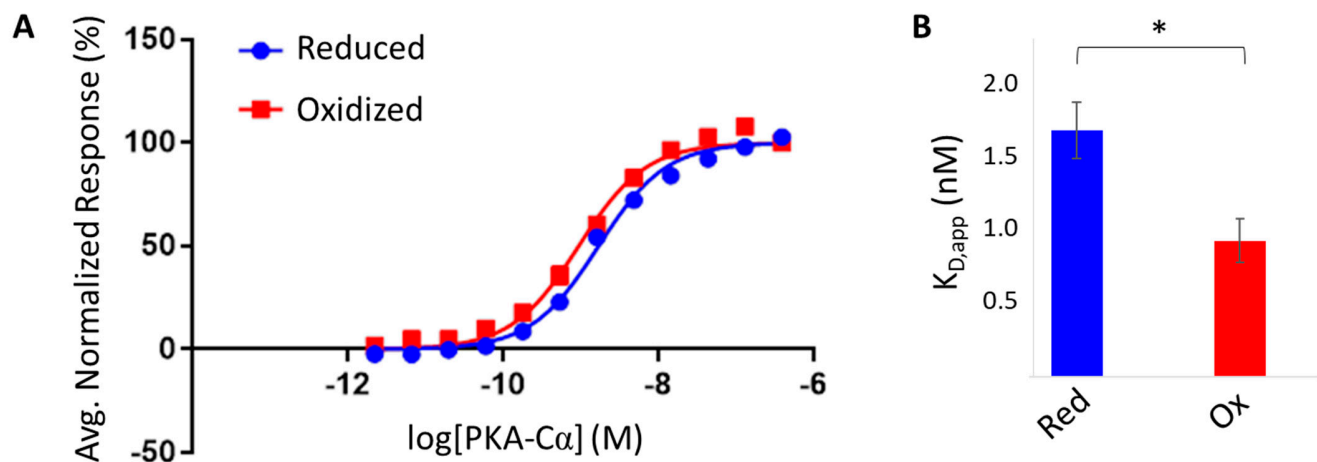

**Figure S6. Fluorescence polarization assays to assess the impact of  $H_2O_2$ -dependent oxidation on PKA-C $\alpha$  interactions with FAM-PKI(5-24).** **A.** Desalted PKA-C $\alpha$  was treated with either  $dH_2O$  (blue circles) or a 20-fold molar excess of  $H_2O_2$  (red squares) for 10 minutes at room temperature before scavenging excess  $H_2O_2$  with catalase. The treated PKA-C $\alpha$  was then incubated with FAM-labeled PKI(5-24) at the indicated concentrations at room temperature for 30 minutes before measuring fluorescence polarization of FAM-PKI(5-24). Error bars represent the standard error about the mean of 3 independent experiments conducted in duplicate. **B.** Average  $K_{D,app}$  of PKA-C $\alpha$  for PKI(5-24) following treatment with  $dH_2O$  (blue) or 5  $\mu M$   $H_2O_2$  alone (red). Error bars represent SE about the mean of at least three independent experiments done in duplicate. \*:  $p < 0.05$ .

|          |                                                    |     |
|----------|----------------------------------------------------|-----|
| PRKACA   | GYIQVTDFGFAKRV-----KGRTWTL <u>C</u> GTPEYLAPEIILS  | 213 |
| PRKACB1  | GYIQVTDFGFAKRV-----KGRTWTL <u>C</u> GTPEYLAPEIILS  | 260 |
| PRKACG   | GYLQVTDFGFAKRV-----KGRTWTL <u>C</u> GTPEYLAPEIILS  | 213 |
| PRKCA    | GHIKIADFGMCKEHMM-DG-VTTRTF <u>C</u> GTPDYIAPEIIAY  | 512 |
| PRKCB1   | GHIKIADFGMCKENIW-DG-VTTKTF <u>C</u> GTPDYIAPEIIAY  | 515 |
| PRKCD    | GHIKIADFGMCKENIF-GE-SRASTF <u>C</u> GTPDYIAPEILQG  | 522 |
| PRKCH    | GHIKITDFGMCKENVF-PG-TTTRTF <u>C</u> GTPDYIAPEILLG  | 529 |
| PRKCI    | GHIKLTDFGMCKEGLR-PG-DTTSTF <u>C</u> GTPNYIAPEILRG  | 427 |
| PRKCQ    | GHIKIADFGMCKENML-GD-AKTNTF <u>C</u> GTPNYIAPEILRG  | 553 |
| PRKCZ1   | GHIKLTDFGMCKEGLG-PG-DTTSTF <u>C</u> GTPNYIAPEILRG  | 425 |
| PRKG1    | GYAKLVDFGFAKKIGF---GKKTWTF <u>C</u> GTPEYVAPEIILN  | 532 |
| PRKAA1   | MNAKIADFGLSNM-MS-DG-EFLRTS <u>C</u> GSPNYAAPEVISG  | 189 |
| PRKAA2   | MNAKIADFGLSNM-MS-DG-EFLRTS <u>C</u> GSPNYAAPEVISG  | 187 |
| RPS6KA1  | GHIKLTDFGLSKEAID-HE-KKAYSF <u>C</u> GTVEYMAPEVVNR  | 236 |
| RPS6KA2A | GHIKITDFGLSKEAID-HD-KRAYSF <u>C</u> GTYEYMAPEVVNR  | 233 |
| RPS6KA3  | GHIKLTDFGLSKESID-HE-KKAYSF <u>C</u> GTVEYMAPEVVNR  | 242 |
| RPS6KA4A | GHIVLTDFGLSKEFLT-EEKERTFSF <u>C</u> GTYEYMAPEIIRS  | 211 |
| RPS6KA5A | GHVVLTDFFGLSKEFVA-DETERAYSF <u>C</u> GTYEYMAPDIVRG | 227 |
| RPS6KA6  | GHIKLTDFGLSKESVD-QE-KKAYSF <u>C</u> GTVEYMAPEVVNR  | 247 |
| AKT1     | GHIKITDFGLCKEGIK-DG-ATMKTF <u>C</u> GTPEYLAPEVLED  | 323 |
| AKT2     | GHIKITDFGLCKEGIS-DG-ATMKTF <u>C</u> GTPEYLAPEVLED  | 324 |
| AKT3     | GHIKITDFGLCKEGIT-DA-ATMKTF <u>C</u> GTPEYLAPEVLED  | 320 |
| SGK1     | GHIVLTDFGLCKENIE-HN-STTSTF <u>C</u> GTPEYLAPEVLHK  | 271 |
| SGK2A    | GHVVLTDFFGLCKEGVE-PE-DTTSTF <u>C</u> GTPEYLAPEVLRK | 208 |
| SGK3     | GHVVLTDFFGLCKEGIA-IS-DTTTTF <u>C</u> GTPEYLAPEVIRK | 335 |
| CAMK1A   | SKIMISDFGLSKM-ED-PG-SVLSTA <u>C</u> GTPGYVAPEVLAQ  | 192 |
| CAMK1D   | SKIMISDFGLSKM-EG-KG-DVMSTA <u>C</u> GTPGYVAPEVLAQ  | 195 |

**Figure S7. Conservation of redox sensitive cysteines among AGC kinase family members.** C199 in the P+1 loop of PKA-C $\alpha$  (PRKACA) is conserved among many AGC kinases. The conserved Cys is highlighted in red. Those sites that are known to be oxidized are underlined.
